# Supplementary material for: Rational design of carbazolyl and aryl phosphine oxide (APO) based ambipolar host materials for blue electrophosphorescence: a density functional theory study
Source: Royal Society of Chemistry journal article supplement (doi:10.1039/c6ra02808j), 2016-01-01
Supplement: c6ra02808j1.pdf [file c6ra02808j1.pdf]

Supporting information for

**Rational Design of Carbazolyl and Aryl Phosphine Oxide (APO)  
Based Ambipolar Host Materials for Blue Electrophosphorescence:  
A Density Functional Theory Study**

Dongmei Zhang, Wei Shen, Xiaguang zhang, Huili Sun, Rongxing He, Ming Li\*

School of Chemistry and Chemical Engineering, Southwest University, Chongqing  
400715, P. R. China

---

\* Corresponding author:

E-mail: [liming@swu.edu.cn](mailto:liming@swu.edu.cn); Phone: +86-023-68253023

**Table S1.** The calculated HOMO and LUMO energies (in eV) of DPESPOPhCz (host 2) via directly measuring HOMO/LUMO eigenvalues from the optimized  $S_0$  results at the different levels.

|      | B3LYP<br>/6-31G* | PBE0<br>/6-31G* | CAM-B3LYP<br>/6-31G* | B3P86<br>/6-31G* | B3P86<br>/6-311G* | exp   |
|------|------------------|-----------------|----------------------|------------------|-------------------|-------|
| HOMO | -5.43            | -5.67           | -6.67                | -6.09            | -6.28             | -6.16 |
| LUMO | -1.24            | -1.12           | 0.12                 | -1.88            | -2.05             | -2.49 |

**Table S2.** Calculated absorption spectra of DPESPOPhCz (host 2) by various functionals

|                      | B3LYP<br>/6-31G* | PBE0<br>/6-31G* | CAM-B3LYP<br>/6-31G* | B3P86<br>/6-31G* | B3P86<br>/6-311G* | exp |
|----------------------|------------------|-----------------|----------------------|------------------|-------------------|-----|
| $\lambda(\text{nm})$ | 338              | 323             | 282                  | 336              | 335               | 331 |

**Table S3.** Calculated transition natures of the  $S_1$  states of studied host molecules based on the  $S_0$  geometry by TD-DFT calculations

| Molecule | $E(S_0 \rightarrow S_1)$ (eV) | $\lambda(\text{nm})$ | Transition nature         |
|----------|-------------------------------|----------------------|---------------------------|
| 1        | 4.05                          | 306                  | H $\rightarrow$ L+1 (93%) |
| 2        | 3.69                          | 336                  | H $\rightarrow$ L (98%)   |
| 3        | 3.61                          | 343                  | H $\rightarrow$ L (97%)   |
| 4        | 3.71                          | 334                  | H $\rightarrow$ L (84%)   |
| 5        | 3.63                          | 342                  | H $\rightarrow$ L (93%)   |
| 6        | 3.69                          | 336                  | H $\rightarrow$ L (94%)   |
| 7        | 3.60                          | 344                  | H $\rightarrow$ L (94%)   |
| 8        | 3.44                          | 361                  | H $\rightarrow$ L (93%)   |
| 9        | 3.48                          | 356                  | H $\rightarrow$ L (84%)   |
| 10       | 3.56                          | 348                  | H $\rightarrow$ L (88%)   |

H = HOMO, L = LUMO

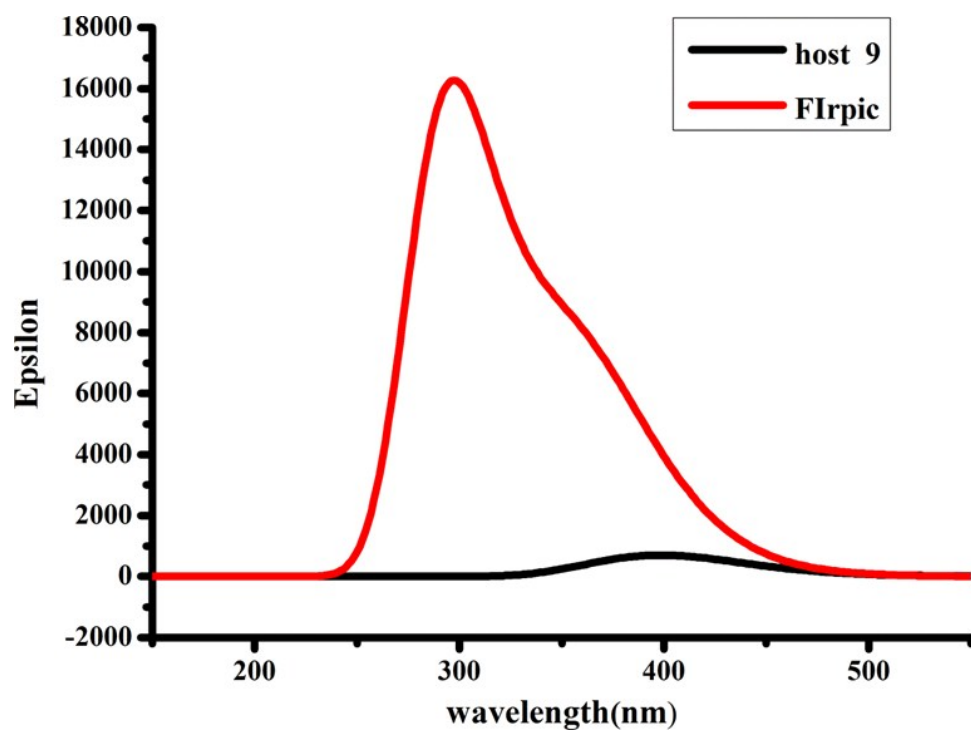

**Figure S1.** Emitter's (FIrpic) absorption spectra and host's emission spectra
